# Supplementary material for: Validation of the Italian version of wisconsin stone quality of life (WISQOL): a prospective Italian multicenter study
Source: Springer Nature journal article supplement (doi:10.1007/s00240-022-01382-7), 2022-12-02
Supplement: MOESM1 [file 240_2022_1382_MOESM1_ESM.pdf]

**Supplementary table 2.** Perioperative outcomes including successful status, complications and stone-related events among the 226 patients included in the analysis.

| <b>Item</b>                                                                                   | <b>Value</b>    |
|-----------------------------------------------------------------------------------------------|-----------------|
| <b>Patients, n. (%)</b>                                                                       | 226 (100.0)     |
| <b>LOS (days), median (IQR)</b>                                                               | 2 (1 – 3)       |
| <b>Clavien-Dindo complications occurred during in-hospital stay, n. (%)</b>                   |                 |
| 1                                                                                             | 21 (9.3)        |
| 2                                                                                             | 1 (0.4)         |
| <b>Detailed in-stay complications, n. (%)</b>                                                 |                 |
| Haematuria                                                                                    | 6 (2.7)         |
| Pneumonia                                                                                     | 1 (0.4)         |
| Post-procedural pain                                                                          | 6 (2.7)         |
| Renal Colic                                                                                   | 3 (1.3)         |
| Chest pain                                                                                    | 1 (0.4)         |
| Fever                                                                                         | 5 (2.2)         |
| <b>Clavien-Dindo complications grade within 30-days after discharge, n. (%)</b>               |                 |
| 1                                                                                             | 17 (7.5)        |
| 2                                                                                             | 2 (0.9)         |
| 3a                                                                                            | 3 (1.3)         |
| 3b                                                                                            | 1 (0.4)         |
| <b>Detailed complications within 30-days after discharge, n. (%)</b>                          |                 |
| Hematuria                                                                                     | 4 (1.8)         |
| stent-related pain                                                                            | 9 (4.0)         |
| Fever                                                                                         | 1 (0.4)         |
| Renal colic                                                                                   | 6 (2.7)         |
| Pyelonephritis                                                                                | 1 (0.4)         |
| dislodged ureteral stent                                                                      | 2 (0.9)         |
| <b>Status at discharge, n. (%)</b>                                                            |                 |
| Indwelling ureteral stent                                                                     | 148 (65.5)      |
| Indwelling nephrostomy tube                                                                   | 5 (2.2)         |
| Indwelling ureteral stent and nephrostomy tube                                                | 2 (0.9)         |
| <b>Length of indwelling drain (ureteral stent and/or nephrostomy tube), days median (IQR)</b> | 21 (1 – 45)     |
| <b>Overall successful status, n. (%)</b>                                                      | 196 (86.7)      |
| <b>Maximum diameter of residual stone (mm), median (IQR)</b>                                  | 6.0 (4.0 - 8.5) |
| <b>Stone-related events at 90-days post-op, n. (%)</b>                                        | 32 (14.2)       |

**Post-operative stone-related events at 90-days post-op., n.**

(%)

|                                                          |         |
|----------------------------------------------------------|---------|
| Renal colic                                              | 5 (2.2) |
| Pyelonephritis                                           | 1 (0.4) |
| Secondary URS/RIRS                                       | 4 (1.8) |
| Stone-related pain                                       | 5 (2.2) |
| Hematuria                                                | 3 (1.3) |
| Renal colics with spontaneous stone passage              | 5 (2.2) |
| Partial nephrectomy for staghorn stone                   | 2 (0.9) |
| Prolonged post-operative pain without obstructing stones | 7 (3.1) |

---

*Abbreviations are as follow: IQR: interquartile range; LOS: length of stay.*

---
