# Supplementary material for: Validation of the Italian version of wisconsin stone quality of life (WISQOL): a prospective Italian multicenter study
Source: Springer Nature journal article supplement (doi:10.1007/s00240-022-01382-7), 2022-12-02
Supplement: MOESM2 [file 240_2022_1382_MOESM2_ESM.pdf]

**Supplementary table 1.** Demographics and pre-operative characteristics of the 226 patients included in the analysis.

| <b>Item</b>                                      | <b>Value</b>        |
|--------------------------------------------------|---------------------|
| <b>Patients, n. (%)</b>                          | 226 (100.0)         |
| <b>Gender, n. (%)</b>                            |                     |
| Male                                             | 141 (62.4)          |
| Female                                           | 85 (37.6)           |
| <b>BMI (kg/m<sup>2</sup>), median (IQR)</b>      | 26.3 (24.3 - 28.1)  |
| <b>Educational level, n. (%)</b>                 |                     |
| Secondary school                                 | 32 (14.2)           |
| High school                                      | 111 (49.1)          |
| University                                       | 43 (19.0)           |
| <b>Prior treatments, n. (%)</b>                  |                     |
| ESWL                                             | 36 (15.9)           |
| RIRS                                             | 28 (12.4)           |
| PCNL/ECIRS                                       | 8 (3.5)             |
| Multiple                                         | 9 (4.0)             |
| <b>Previous renal colic, n. (%)</b>              | 56 (24.8)           |
| <b>Stone size (mm<sup>2</sup>), median (IQR)</b> | 130 (56 - 250)      |
| <b>Skin to stone distance (mm), median (IQR)</b> | 90.5 (74.3 - 106.3) |
| <b>Hydronephrosis, n. (%)</b>                    |                     |
| mild                                             | 45 (19.9)           |
| moderate                                         | 34 (15.1)           |
| severe                                           | 23 (10.2)           |
| <b>N. calyces involved, n. (%)</b>               |                     |
| 1                                                | 116 (51.3)          |
| 2                                                | 45 (19.9)           |
| 3                                                | 13 (5.8)            |
| Staghorn                                         | 8 (3.5)             |
| Ureteric                                         | 40 (17.7)           |
| <b>Stone density (HU), median (IQR)</b>          | 900 (670 - 1159)    |
| <b>N. stones, median (IQR)</b>                   | 1 (1 - 2)           |
| <b>Pre-stented, n. (%)</b>                       | 56 (24.8)           |
| <b>Preoperative nephrostomy, n. (%)</b>          | 14 (6.2)            |
| <b>The Guy's scoring system, median (IQR)</b>    | 2 (1 - 2)           |
| <b>STONE score, median (IQR)</b>                 | 7 (5 - 8)           |
| <b>Type of delivered treatment (%)</b>           |                     |
| ESWL                                             | 64(28.3)            |
| URS/RIRS                                         | 112 (49.5)          |
| PCNL                                             | 50 (22.12)          |

*Abbreviations are as follow: BMI: Body Mass Index; IQR: interquartile range; ESWL: Extracorporeal Shock Wave Lithotripsy; RIRS: Retrograde Intrarenal Surgery; PCNL: Percutaneous Nephrolithotomy; ECIRS: Endoscopic Combined Intrarenal Surgery; URS: ureteroscopy*
